# Supplementary material for: Non-Pharmacological Integrated Interventions for Adults Targeting Type 2 Diabetes and Mental Health Comorbidity: A Mixed-Methods Systematic Review
Source: PubMed Central journal article supplement (PMC9248983; doi:10.5334/ijic.5960), 2022-06-29
Supplement: ijic-22-2-5960-s1.pdf [file ijic-22-2-5960-s1.pdf]

## **(8). Supplementary material**

### File 1. Search strategy

Search strategy for Cochrane Library

#1 - MeSh descriptor: [Diabetes Mellitus, Type 2] explode all trees

#2 - Diabetes

#3 - Diabetes mellitus

#4 -Diabetes type 2

#5 - Glucose metabolism disorder

#6 - Type II diabetes

#7 - #1 or #2 or #3 or #4 or #5 or #6

#8 - MeSh descriptor: [Mental Disorders] explode all trees

#9 - Severe mental disorder

#10 - Severe mental illness

#11 - Severe mental disease

#12 - Serious mental illness

#13 - Serious mental disorder

#14 - Serious mental disease

#15 - SMI

#16 - Psychosis

#17 - Schizophrenia

#18 - Schizophrenia disorder

#19 - Bipolar disorder

#20 - #8 or #9 or #10 or #11 or #12 or #13 or #14 or #15 or #15 or #16 or #17 or #18 or #19

Intervention

#21 - MeSh descriptor: [Clinical Study] explode all trees

#22 - MeSh descriptor: [Qualitative Research] explode all trees

#23 - Intervention

#24 - Clinical trial\*

#25 - Self management

#26 - Clinical stud\*

#27 - Randomi\* controlled trial\*

#28 - RCT

#29 - Self care

#30 - Intervention stud\*

#31 - Lifestyle

#32 - Case series stud\*

#33 - Feasibility stud\*

#34 - Pilot stud\*

#35 - Interview\*

#36 - Qualitative

#37 - Qualitative stud\*

#38 - #21 or #22 or #23 or #24 or #25 or #26 or #27 or #28 or #29 or #30 or #31 or #32 or #33 or #34 or #35 or #36 or #37

#39 - #7 and #20 and #38

#40 - MeSh descriptor: [Pharmacology] explode all trees

#41 - #39 and #40

#42 - #39 not #41

Limits - Trials

#### Search strategy for CINAHL

S1 - (MM "Diabetes Mellitus, Type 2") OR (MM "Diabetes Mellitus") OR (MM "Diabetic Patients") OR "diabetes OR diabetes mellitus OR ( type 2 diabetes or type 2 diabetes mellitus or t2dm ) OR Glucose Metabolism Disorders" OR (MM "Glucose Metabolism Disorders")

S2 - (MM "Psychotic Disorders") OR (MM "Schizophrenia") OR (MM "Schizoaffective Disorder") OR (MM "Bipolar Disorder") OR (MM "Mental Disorders")

S3 - (MM "Intervention Trials") OR (MM "Life Style") OR (MM "Randomized Controlled Trials") OR (MM "Clinical Trials") OR (MM "Self Care") OR (MM "Self-Management") OR (MM "Qualitative Studies") OR (MM "Prospective Studies") OR (MM "Pilot Studies")

S4 - S1 AND S2 AND S3

#### Search strategy for ClinicalTrials.gov

Condition: 'Mental health', 'Diabetes'

Filters: 'Adult (18-640)'; 'Older adult (65+)'

Recruitment: 'completed' and 'has results'

### Search strategy for HMIC - Health Management Information Centre (Ovid)

1. exp Mental Disorders/
2. psychosis.mp. [mp=title, abstract, heading word, table of contents, key concepts, original title, tests & measures, mesh]
3. schizophrenia.mp. [mp=title, abstract, heading word, table of contents, key concepts, original title, tests & measures, mesh]
4. schizophrenia disorder.mp. [mp=title, abstract, heading word, table of contents, key concepts, original title, tests & measures, mesh]
5. bipolar disorder.mp. [mp=title, abstract, heading word, table of contents, key concepts, original title, tests & measures, mesh]
6. severe mental disorder\*.mp. [mp=title, abstract, heading word, table of contents, key concepts, original title, tests & measures, mesh]
7. severe mental illness\*.mp. [mp=title, abstract, heading word, table of contents, key concepts, original title, tests & measures, mesh]
8. serious mental disorder\*.mp. [mp=title, abstract, heading word, table of contents, key concepts, original title, tests & measures, mesh]
9. serious mental illness\*.mp. [mp=title, abstract, heading word, table of contents, key concepts, original title, tests & measures, mesh]
10. serious mental disease\*.mp. [mp=title, abstract, heading word, table of contents, key concepts, original title, tests & measures, mesh]
11. 1 or 2 or 3 or 4 or 5 or 6 or 7 or 8 or 9 or 10
12. exp Type 2 Diabetes/
13. diabetes.mp. [mp=title, abstract, heading word, table of contents, key concepts, original title, tests & measures, mesh]
14. diabetes mellitus.mp. [mp=title, abstract, heading word, table of contents, key concepts, original title, tests & measures, mesh]
15. diabetes type 2.mp. [mp=title, abstract, heading word, table of contents, key concepts, original title, tests & measures, mesh]
16. diabetes 2.mp. [mp=title, abstract, heading word, table of contents, key concepts, original title, tests & measures, mesh]
17. glucose metabolism disorder.mp. [mp=title, abstract, heading word, table of contents, key concepts, original title, tests & measures, mesh]
18. type 2.mp. [mp=title, abstract, heading word, table of contents, key concepts, original title, tests & measures, mesh]

19. type II diabetes.mp. [mp=title, abstract, heading word, table of contents, key concepts, original title, tests & measures, mesh]
20. 12 or 13 or 14 or 15 or 16 or 17 or 18 or 19
21. exp Intervention/
22. early intervention.mp. [mp=title, abstract, heading word, table of contents, key concepts, original title, tests & measures, mesh]
23. self-management.mp. [mp=title, abstract, heading word, table of contents, key concepts, original title, tests & measures, mesh]
24. clinical trial\*.mp. [mp=title, abstract, heading word, table of contents, key concepts, original title, tests & measures, mesh]
25. clinical stud\*.mp. [mp=title, abstract, heading word, table of contents, key concepts, original title, tests & measures, mesh]
26. randomis\* controlled trial\*.mp. [mp=title, abstract, heading word, table of contents, key concepts, original title, tests & measures, mesh]
27. RCT.mp. [mp=title, abstract, heading word, table of contents, key concepts, original title, tests & measures, mesh]
28. self care.mp. [mp=title, abstract, heading word, table of contents, key concepts, original title, tests & measures, mesh]
29. intervention stud\*.mp. [mp=title, abstract, heading word, table of contents, key concepts, original title, tests & measures, mesh]
30. health promotion.mp. [mp=title, abstract, heading word, table of contents, key concepts, original title, tests & measures, mesh]
31. collaborative care.mp. [mp=title, abstract, heading word, table of contents, key concepts, original title, tests & measures, mesh]
32. case series stud\*.mp. [mp=title, abstract, heading word, table of contents, key concepts, original title, tests & measures, mesh]
33. feasibility stud\*.mp. [mp=title, abstract, heading word, table of contents, key concepts, original title, tests & measures, mesh]
34. pilot stud\*.mp. [mp=title, abstract, heading word, table of contents, key concepts, original title, tests & measures, mesh]
35. interview\*.mp. [mp=title, abstract, heading word, table of contents, key concepts, original title, tests & measures, mesh]
36. (qualitative adj3 stud\*).mp. [mp=title, abstract, heading word, table of contents, key concepts, original title, tests & measures, mesh]
37. qualitative.mp. [mp=title, abstract, heading word, table of contents, key concepts, original title, tests & measures, mesh]
38. Prospective Stud\*.mp. [mp=title, abstract, heading word, table of contents, key concepts, original title, tests & measures, mesh]

39. (lifestyle adj3 intervention\*).mp. [mp=title, abstract, heading word, table of contents, key concepts, original title, tests & measures, mesh]
40. illness management.mp. [mp=title, abstract, heading word, table of contents, key concepts, original title, tests & measures, mesh]
41. 21 or 22 or 23 or 24 or 25 or 26 or 27 or 28 or 29 or 30 or 31 or 32 or 33 or 34 or 35 or 36 or 37 or 38 or 39 or 40
42. 11 and 20 and 41
43. limit 42 to (english language and ("300 adulthood " or 320 young adulthood or 340 thirties or 360 middle age or "380 aged " or "390 very old "))

### Search strategy for OpenGrey

Search terms: 'Diabetes' AND 'Mental'

### Search terms and subject headings for PsychInfo

1. exp Mental Disorders/
2. psychosis.mp. [mp=title, abstract, heading word, table of contents, key concepts, original title, tests & measures, mesh]
3. schizophrenia.mp. [mp=title, abstract, heading word, table of contents, key concepts, original title, tests & measures, mesh]
4. schizophrenia disorder.mp. [mp=title, abstract, heading word, table of contents, key concepts, original title, tests & measures, mesh]
5. bipolar disorder.mp. [mp=title, abstract, heading word, table of contents, key concepts, original title, tests & measures, mesh]
6. severe mental disorder\*.mp. [mp=title, abstract, heading word, table of contents, key concepts, original title, tests & measures, mesh]
7. severe mental illness\*.mp. [mp=title, abstract, heading word, table of contents, key concepts, original title, tests & measures, mesh]
8. serious mental disorder\*.mp. [mp=title, abstract, heading word, table of contents, key concepts, original title, tests & measures, mesh]
9. serious mental illness\*.mp. [mp=title, abstract, heading word, table of contents, key concepts, original title, tests & measures, mesh]
10. serious mental disease\*.mp. [mp=title, abstract, heading word, table of contents, key concepts, original title, tests & measures, mesh]
11. 1 or 2 or 3 or 4 or 5 or 6 or 7 or 8 or 9 or 10
12. exp Type 2 Diabetes/

13. diabetes.mp. [mp=title, abstract, heading word, table of contents, key concepts, original title, tests & measures, mesh]
14. diabetes mellitus.mp. [mp=title, abstract, heading word, table of contents, key concepts, original title, tests & measures, mesh]
15. diabetes type 2.mp. [mp=title, abstract, heading word, table of contents, key concepts, original title, tests & measures, mesh]
16. diabetes 2.mp. [mp=title, abstract, heading word, table of contents, key concepts, original title, tests & measures, mesh]
17. glucose metabolism disorder.mp. [mp=title, abstract, heading word, table of contents, key concepts, original title, tests & measures, mesh]
18. type 2.mp. [mp=title, abstract, heading word, table of contents, key concepts, original title, tests & measures, mesh]
19. type II diabetes.mp. [mp=title, abstract, heading word, table of contents, key concepts, original title, tests & measures, mesh]
20. 12 or 13 or 14 or 15 or 16 or 17 or 18 or 19
21. exp Intervention/
22. early intervention.mp. [mp=title, abstract, heading word, table of contents, key concepts, original title, tests & measures, mesh]
23. self-management.mp. [mp=title, abstract, heading word, table of contents, key concepts, original title, tests & measures, mesh]
24. clinical trial\*.mp. [mp=title, abstract, heading word, table of contents, key concepts, original title, tests & measures, mesh]
25. clinical stud\*.mp. [mp=title, abstract, heading word, table of contents, key concepts, original title, tests & measures, mesh]
26. randomis\* controlled trial\*.mp. [mp=title, abstract, heading word, table of contents, key concepts, original title, tests & measures, mesh]
27. RCT.mp. [mp=title, abstract, heading word, table of contents, key concepts, original title, tests & measures, mesh]
28. self care.mp. [mp=title, abstract, heading word, table of contents, key concepts, original title, tests & measures, mesh]
29. intervention stud\*.mp. [mp=title, abstract, heading word, table of contents, key concepts, original title, tests & measures, mesh]
30. health promotion.mp. [mp=title, abstract, heading word, table of contents, key concepts, original title, tests & measures, mesh]
31. collaborative care.mp. [mp=title, abstract, heading word, table of contents, key concepts, original title, tests & measures, mesh]
32. case series stud\*.mp. [mp=title, abstract, heading word, table of contents, key concepts, original title, tests & measures, mesh]

33. feasibility stud\*.mp. [mp=title, abstract, heading word, table of contents, key concepts, original title, tests & measures, mesh]
34. pilot stud\*.mp. [mp=title, abstract, heading word, table of contents, key concepts, original title, tests & measures, mesh]
35. interview\*.mp. [mp=title, abstract, heading word, table of contents, key concepts, original title, tests & measures, mesh]
36. (qualitative adj3 stud\*).mp. [mp=title, abstract, heading word, table of contents, key concepts, original title, tests & measures, mesh]
37. qualitative.mp. [mp=title, abstract, heading word, table of contents, key concepts, original title, tests & measures, mesh]
38. Prospective Stud\*.mp. [mp=title, abstract, heading word, table of contents, key concepts, original title, tests & measures, mesh]
39. (lifestyle adj3 intervention\*).mp. [mp=title, abstract, heading word, table of contents, key concepts, original title, tests & measures, mesh]
40. illness management.mp. [mp=title, abstract, heading word, table of contents, key concepts, original title, tests & measures, mesh]
41. 21 or 22 or 23 or 24 or 25 or 26 or 27 or 28 or 29 or 30 or 31 or 32 or 33 or 34 or 35 or 36 or 37 or 38 or 39 or 40
42. 11 and 20 and 41
43. limit 42 to (english language and ("300 adulthood " or 320 young adulthood or 340 thirties or 360 middle age or "380 aged " or "390 very old "))

### Search strategy for PubMed

(((((("Diabetes Mellitus"[Mesh] OR "Glucose Metabolism Disorders"[Mesh]) OR "diabetes mellitus"[All Fields]) OR "diabetes mellitus, type 2"[All Fields]) AND (((((((((((((((("Clinical Trials as Topic"[Mesh] OR "Clinical Trial"[Publication Type]) OR "Self Care"[Mesh]) OR "Clinical Study"[Publication Type]) OR "Clinical Studies as Topic"[Mesh]) OR "clinical trial"[All Fields]) OR "Prospective Studies"[All Fields]) OR "Qualitative"[All Fields]) OR "qualitative research"[All Fields]) OR "Interview"[Publication Type]) OR "Interview"[All Fields]) OR "self care"[All Fields]) OR "clinical study"[All Fields]) OR "self management"[All Fields]) OR "self-management"[All Fields]) OR ("methods"[MeSH Terms] OR "methods"[All Fields] OR "intervention"[All Fields])) OR "collaborative care"[All Fields]) OR "lifestyle intervention"[All Fields] OR "intervention studies"[All Fields] OR "intervention study"[All Fields] OR "health promotion"[All Fields] OR "pilot study"[All Fields] OR "feasibility study"[All Fields] OR "case series study"[All Fields] OR "exercise"[All Fields] OR "physical activity"[All Fields] OR "diet"[All Fields] OR "weight reduction"[All Fields] OR "weight loss"[All Fields])

AND "lifestyle"[All Fields] OR "goal setting"[All Fields] OR "weight change"[All Fields] OR "illness management"[All Fields]) AND (((((((("Schizophrenia Spectrum and Other Psychotic Disorders"[Mesh] OR "Bipolar and Related Disorders"[Mesh]) OR ("schizophrenia"[MeSH Terms] OR "schizophrenia"[All Fields])) OR "bipolar disorder"[All Fields]) OR "smi"[All Fields]) OR "severe mental illness"[All Fields]) OR "severe mental disorder"[All Fields]) OR "severe mental disease"[All Fields]) OR "serious mental illness"[All Fields]) OR "serious mental disorder"[All Fields]) OR "serious mental disease"[All Fields])) AND ("adult"[MeSH Terms] OR "young adult"[MeSH Terms] OR "adult"[MeSH Terms:noexp] OR ("middle aged"[MeSH Terms] OR "aged"[MeSH Terms]) OR "middle aged"[MeSH Terms] OR "aged"[MeSH Terms] OR "aged, 80 and over"[MeSH Terms])

Limits: English

### Search strategy for Scopus

( TITLE-ABS-KEY ( diabetes ) OR TITLE-ABS-KEY ( "diabetes mellitus" ) OR TITLE-ABS-KEY ( "diabetes mellitus type 2" ) OR TITLE-ABS-KEY ( "diabetes type 2" ) OR TITLE-ABS-KEY ( "type 2 diabetes" ) AND TITLE-ABS-KEY ( schizophrenia ) OR TITLE-ABS-KEY ( schizoaffective ) OR TITLE-ABS-KEY ( "schizoaffective disorder" ) OR TITLE-ABS-KEY ( bipolar ) OR TITLE-ABS-KEY ( "bipolar disorder" ) OR TITLE-ABS-KEY ( psychosis ) OR TITLE-ABS-KEY ( smi ) OR TITLE-ABS-KEY ( "severe mental illness" ) OR TITLE-ABS-KEY ( "severe mental disease" ) OR TITLE-ABS-KEY ( "severe mental disorder" ) OR TITLE-ABS-KEY ( "serious mental illness" ) OR TITLE-ABS-KEY ( "serious mental disease" ) OR TITLE-ABS-KEY ( "serious mental disorder" ) AND TITLE-ABS-KEY ( "clinical study" ) OR TITLE-ABS-KEY ( "clinical studies" ) OR TITLE-ABS-KEY ( "clinical trial" ) OR TITLE-ABS-KEY ( "Prospective Studies" ) OR TITLE-ABS-KEY ( "Qualitative studies" ) OR TITLE-ABS-KEY ( interview ) OR TITLE-ABS-KEY ( "pilot studies" ) OR TITLE-ABS-KEY ( "feasibility studies" ) OR TITLE-ABS-KEY ( "case series studies" ) OR TITLE-ABS-KEY ( "self-care" ) OR TITLE-ABS-KEY ( "self care" ) OR TITLE-ABS-KEY ( "self management" ) OR TITLE-ABS-KEY ( "self-management" ) OR TITLE-ABS-KEY ( intervention ) OR TITLE-ABS-KEY ( "intervention study" ) OR TITLE-ABS-KEY ( "intervention studies" ) OR TITLE-ABS-KEY ( "lifestyle intervention" ) OR TITLE-ABS-KEY ( "collaborative care" ) OR TITLE-ABS-KEY ( qualitative ) OR TITLE-ABS-KEY ( "illness management" ) ) AND ( LIMIT TO ( LANGUAGE , "English" ) ) AND ( EXCLUDE ( DOCTYPE , "re" ) )

### Search strategy for International Clinical Trials Registry Platform Search Portal – World Health Organisation

Search strategy: 'Diabetes' AND 'Mental health'

Filter: 'With results'
